# Supplementary material
Source: PubMed Central journal article supplement (PMC4548459)

**Supplemental table 1: Baseline demographics of women assessed for CMV shedding**

|                                | <b>(n=96)</b> |
|--------------------------------|---------------|
| Enrollment age (years)         |               |
| 20-29                          | 23 (24%)      |
| 30-39                          | 41 (43%)      |
| 40-49                          | 24 (25%)      |
| 50+                            | 8 (8%)        |
| Pre-ART viral load (copies/mL) |               |
| < 10,000                       | 15 (16%)      |
| 10,000-100,000                 | 34 (35%)      |
| 100,000-1,000,000              | 41 (43%)      |
| >1,000,000                     | 6 (6%)        |
| Pre-ART CD4 count (cells/uL)   |               |
| <200                           | 40 (42%)      |
| >200                           | 56 (58%)      |
| Trial arm                      |               |
| Placebo                        | 53 (55%)      |
| Acyclovir                      | 43 (45%)      |

ART: antiretroviral therapy.

Supplemental figure 1: Average levels of vaginal CMV DNA of all women with detectable shedding for each individual monthly visit (A) and by ART status (0=No ART, 1=ART; B) are shown. Box plots show mean and 95% confidence interval.

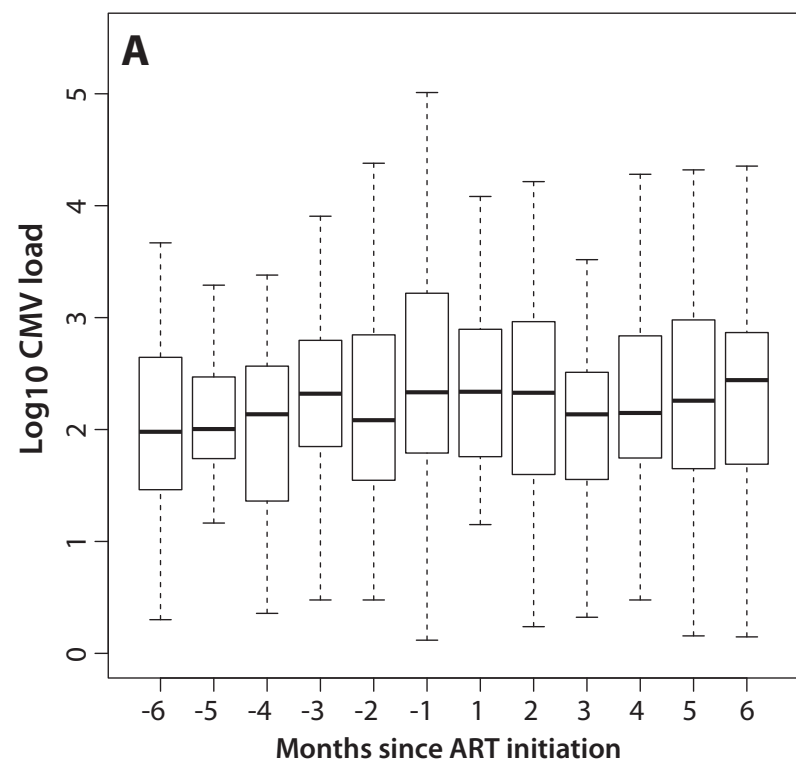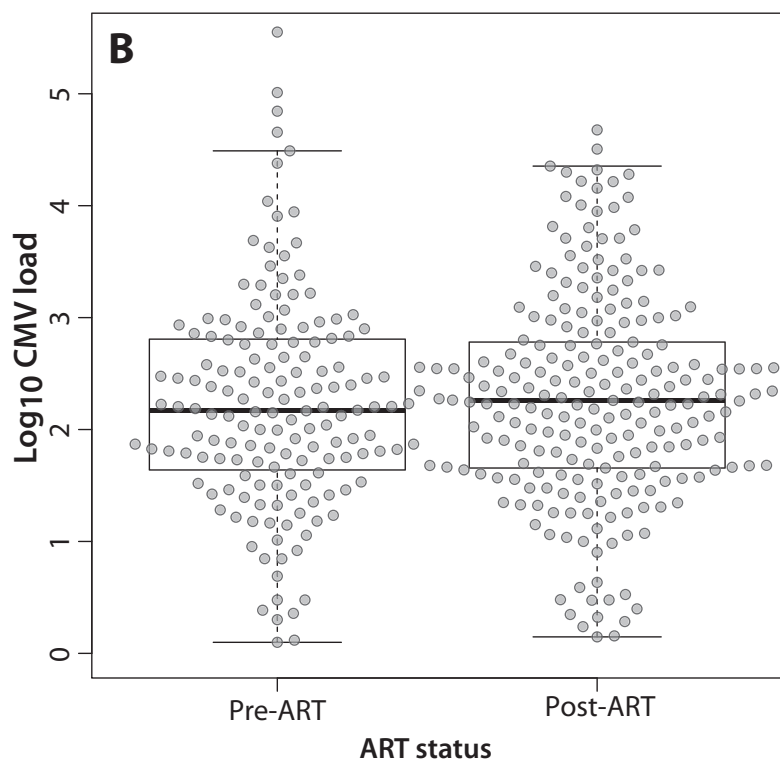

Supplement: supp_jiv135_jiv135supp.pdf [file supp_jiv135_jiv135supp.pdf]
